# Supplementary material for: Deep Learning to Predict Protein Backbone Structure from High-Resolution Cryo-EM Density Maps
Source: PubMed Central journal article supplement (PMC7063051; doi:10.1038/s41598-020-60598-y), 2020-03-09
Supplement: 41598_2020_60598_MOESM1_ESM.pdf [file 41598_2020_60598_MOESM1_ESM.pdf]

Supplementary Information  
for  
Deep Learning to Predict Protein  
Backbone Structure from  
High-Resolution Cryo-EM Density Maps

Dong Si<sup>1\*</sup>, Spencer A. Moritz<sup>1</sup>, Jonas Pfab<sup>1</sup>, Jie Hou<sup>2,3</sup>, Renzhi Cao<sup>4</sup>, Ligu Wang<sup>5</sup>,  
Tianqi Wu<sup>6</sup>, Jianlin Cheng<sup>6</sup>

<sup>1</sup> Division of Computing and Software Systems, University of Washington,  
Bothell, WA, 98011, USA

\*Corresponding to Dong Si, [dongsi@uw.edu](mailto:dongsi@uw.edu)

<sup>2</sup> Department of Computer Science, Saint Louis University, Saint Louis, MO  
63103, USA

<sup>3</sup> Program in Bioinformatics & Computational Biology, Saint Louis University,  
Saint Louis, MO 63103, USA

<sup>4</sup> Department of Computer Science, Pacific Lutheran University,  
Tacoma, WA 98447, USA

<sup>5</sup> Department of Biological Structure, University of Washington,  
Seattle, WA 98185, USA

<sup>6</sup> Department of Electrical Engineering and Computer Science, University of  
Missouri,  
Columbia, MO 65211, USA

Table S1. Extended Table 1 - Results of simulated maps on different resolutions\*.

(A) at 4Å resolution.

| PDB ID      | Pred. Ca | Native Ca | RMSD (Å) | % Ca in 3Å | FP% |
|-------------|----------|-----------|----------|------------|-----|
| 3i2n        | 353      | 346       | 0.97     | 99.4       | 0.8 |
| 3n2t        | 342      | 327       | 1.11     | 99.7       | 0.3 |
| 3qc7        | 167      | 172       | 0.83     | 95.3       | 0.0 |
| 5i68        | 693      | 662       | 0.92     | 100.0      | 2.5 |
| 6ahv        | 359      | 345       | 1.01     | 99.7       | 1.9 |
| 6eyw        | 404      | 381       | 1.07     | 98.7       | 0.7 |
| 6g61        | 115      | 111       | 1.01     | 100.0      | 0.9 |
| <b>Avg.</b> |          |           | 0.99     | 99.0       |     |

(B) at 5Å resolution.

| PDB ID      | Pred. Ca | Native Ca | RMSD (Å) | % Ca in 3Å | FP% |
|-------------|----------|-----------|----------|------------|-----|
| 3i2n        | 350      | 346       | 0.99     | 99.1       | 0.3 |
| 3n2t        | 347      | 327       | 1.09     | 99.1       | 1.7 |
| 3qc7        | 167      | 172       | 1.03     | 94.8       | 0.0 |
| 5i68        | 675      | 662       | 0.91     | 99.5       | 1.3 |
| 6ahv        | 354      | 345       | 1.03     | 99.4       | 1.1 |
| 6eyw        | 384      | 381       | 0.90     | 98.4       | 0.3 |
| 6g61        | 111      | 111       | 0.81     | 100.0      | 0.0 |
| <b>Avg.</b> |          |           | 0.97     | 98.6       |     |

\*Note: There are two types of RMSD, labeled and non-labeled RMSD. The labeled RMSD considers the pair of corresponding CA positions that were labeled by the same residue number, while non-labeled doesn't. The RMSD in this table is non-labeled RMSD.

Table S2. Comparison of our method with state-of-the-art methods: Phenix, RosettaES, RosettaCM, and MAINMAST on the dataset of 43 missing fragments\*.

| Model | Original results from Paper |               |           |           |          | New Run using Phenix (1.16-3549) |                 | Our method |          |
|-------|-----------------------------|---------------|-----------|-----------|----------|----------------------------------|-----------------|------------|----------|
|       | Residue_Range               | Total_Residue | RosettaES | RosettaCM | MAINMAST | Phenix                           | Phenix_coverage | Final RMSD | coverage |
| BPP1  | 1-111                       | 111           | 2.500     | 48.600    | 3.200    | 0.931                            | 0.811           | 1.035      | 0.964    |
| BPP1  | 119-207                     | 89            | 3.400     | 30.800    | 3.600    | 1.370                            | 0.573           | 1.006      | 0.337    |
| BPP1  | 207-259                     | 53            | 0.900     | 4.200     | 2.100    | 1.636                            | 0.038           | 1.378      | 0.226    |
| BPP1  | 256-283                     | 28            | 0.700     | 0.700     | 2.200    | 1.288                            | 0.571           | 1.079      | 0.964    |
| BPP1  | 283-327                     | 45            | 2.000     | 30.500    | 6.000    | 1.449                            | 0.911           | 1.071      | 0.911    |
| FrhA  | 1-22                        | 22            | 0.500     | 6.400     | 1.400    | -                                | 0.000           | -          | 0.000    |
| FrhA  | 136-165                     | 30            | 2.100     | 3.200     | 0.900    | 1.339                            | 0.900           | 0.933      | 1.000    |
| FrhA  | 187-265                     | 79            | 1.900     | 11.600    | 1.900    | 1.153                            | 0.861           | 1.147      | 0.316    |
| FrhA  | 24-29                       | 26            | 0.600     | 0.900     | 0.600    | -                                | 0.000           | 1.301      | 0.833    |
| FrhA  | 298-339                     | 42            | 0.800     | 10.600    | 2.100    | 1.107                            | 0.881           | 1.117      | 1.000    |
| FrhA  | 337-358                     | 22            | 0.500     | 0.500     | 1.900    | 1.320                            | 0.909           | 0.808      | 1.000    |
| FrhB  | 1-18                        | 18            | 0.700     | 1.400     | 0.700    | -                                | 0.000           | 0.885      | 0.941    |
| FrhB  | 110-143                     | 34            | 0.700     | 3.700     | 1.100    | 1.081                            | 0.176           | 1.088      | 0.971    |
| FrhB  | 179-228                     | 50            | 0.700     | 4.100     | 1.100    | -                                | 0.000           | 0.969      | 0.980    |
| FrhB  | 36-66                       | 31            | 1.000     | 1.500     | 1.400    | 0.784                            | 0.387           | 1.128      | 0.903    |
| FrhB  | 61-87                       | 27            | 0.800     | 2.000     | 2.700    | 0.987                            | 0.370           | 0.963      | 0.963    |
| FrhB  | 87-108                      | 22            | 1.000     | 0.800     | 0.700    | 0.661                            | 1.000           | 0.908      | 1.000    |
| FrhG  | 1-71                        | 71            | 3.300     | 28.600    | 3.500    | 1.790                            | 0.014           | 1.018      | 0.789    |
| FrhG  | 144-172                     | 29            | 0.900     | 1.700     | 1.700    | 2.256                            | 0.310           | 0.948      | 0.862    |
| FrhG  | 192-228                     | 37            | 3.000     | 1.600     | 2.700    | -                                | 0.000           | -          | 0.000    |
| FrhG  | 73-133                      | 61            | 6.600     | 5.900     | 1.600    | 1.824                            | 0.311           | 1.097      | 0.967    |
| STIV  | 1-163                       | 163           | 16.900    | 45.900    | 17.300   | 1.779                            | 0.130           | 1.262      | 0.883    |
| STIV  | 161-252                     | 92            | 2.300     | 15.900    | 3.200    | -                                | 0.000           | 1.132      | 0.967    |
| STIV  | 252-319                     | 68            | 1.800     | 11.200    | 1.300    | -                                | 0.000           | 1.090      | 0.941    |
| T20S  | 13-50                       | 38            | 1.600     | 14.600    | 2.100    | 1.529                            | 0.132           | 2.144      | 0.474    |
| T20S  | 159-220                     | 63            | 1.600     | 37.300    | 4.100    | 1.463                            | 0.452           | 2.313      | 0.161    |
| T20S  | 43-78                       | 36            | 4.300     | 2.100     | 2.200    | -                                | 0.000           | 2.126      | 0.472    |
| T20S  | 88-166                      | 79            | 1.100     | 5.900     | 6.000    | 1.242                            | 0.430           | 2.173      | 0.266    |
| TMV   | 1-11                        | 11            | 0.700     | 0.600     | 0.700    | 0.523                            | 0.636           | 0.834      | 0.909    |

|             |         |     |              |               |              |                                             |              |                                             |              |
|-------------|---------|-----|--------------|---------------|--------------|---------------------------------------------|--------------|---------------------------------------------|--------------|
| TMV         | 44-78   | 35  | 0.800        | 0.800         | 1.100        | 0.913                                       | 0.829        | 0.949                                       | 1.000        |
| TMV         | 78-106  | 29  | 3.200        | 1.500         | 1.000        | 0.992                                       | 0.621        | 1.112                                       | 0.241        |
| TRPV1       | 1-45    | 45  | 6.100        | 3.000         | 2.600        | 1.612                                       | 0.644        | 1.918                                       | 0.044        |
| TRPV1       | 111-134 | 24  | 1.600        | 5.600         | 1.800        | 1.399                                       | 0.895        | 1.262                                       | 0.947        |
| TRPV1       | 128-183 | 56  | 4.000        | 4.800         | 1.600        | 0.766                                       | 0.964        | 1.221                                       | 0.964        |
| TRPV1       | 205-226 | 22  | 3.400        | 0.700         | 1.500        | 0.938                                       | 0.955        | 0.956                                       | 1.000        |
| TRPV1       | 226-310 | 85  | 7.000        | 3.500         | 3.000        | 0.869                                       | 0.929        | 1.097                                       | 0.953        |
| TRPV1       | 66-110  | 45  | 1.400        | 1.700         | 2.900        | 0.588                                       | 0.622        | 1.248                                       | 0.556        |
| VP6         | 1-81    | 81  | 2.600        | 43.300        | 3.900        | 1.144                                       | 0.049        | 1.286                                       | 0.975        |
| VP6         | 115-245 | 131 | 4.200        | 38.500        | 11.000       | 2.050                                       | 0.145        | 1.554                                       | 0.832        |
| VP6         | 243-269 | 27  | 2.900        | 2.000         | 1.800        | -                                           | 0.000        | 1.587                                       | 1.000        |
| VP6         | 266-299 | 34  | 0.700        | 8.500         | 1.100        | -                                           | 0.000        | 1.604                                       | 0.971        |
| VP6         | 300-350 | 51  | 0.600        | 3.600         | 2.300        | -                                           | 0.000        | 1.546                                       | 0.922        |
| VP6         | 349-372 | 24  | 1.100        | 1.000         | 1.000        | -                                           | 0.000        | 1.867                                       | 0.250        |
| VP6         | 87-118  | 32  | 0.600        | 1.600         | 1.400        | 1.339                                       | 0.969        | 1.316                                       | 1.000        |
| <b>avg.</b> |         |     | <b>2.389</b> | <b>10.293</b> | <b>2.681</b> | <b>1.254</b><br><b>(exclude 0 coverage)</b> | <b>0.419</b> | <b>1.273</b><br><b>(exclude 0 coverage)</b> | <b>0.742</b> |

\*Note: The results of MAINMAST and Rosetta are from MAINMAST paper (Terashi, et al. *Nature communications*, 2018). The labeled RMSD is used for MAINMAST and Rosetta. We use “-” to fill the fields that are not covered by the prediction. Non-labeled RMSD and matching percentage are calculated based on Phenix.chain\_comparison [https://www.phenix-online.org/documentation/reference/chain\\_comparison.html](https://www.phenix-online.org/documentation/reference/chain_comparison.html)).

Table S3. Comparison of Phenix, Rosetta do-novo, MAINMAST and our method on the dataset of 30 experimental maps\*.

| EMDB ID     | MAINMAST                         |                   | Rosetta de-novo                 |                  | Phenix                         |                 | Our method                         |                     |
|-------------|----------------------------------|-------------------|---------------------------------|------------------|--------------------------------|-----------------|------------------------------------|---------------------|
|             | Matching Percentage for MAINMAST | RMSD for MAINMAST | Matching Percentage for Rosetta | RMSD for Rosetta | Matching Percentage for Phenix | RMSD for Phenix | Matching Percentage for our method | RMSD for our method |
| 1461A       | 0.860                            | 30.600            | 0.780                           | 17.900           | 0.018                          | 1.117           | 0.917                              | 1.336               |
| 2364A       | 0.670                            | 34.700            | -                               | -                | 0.021                          | 1.816           | 0.586                              | 1.941               |
| 2513A       | 0.960                            | 3.800             | 0.900                           | 9.900            | 0.128                          | 1.143           | 0.982                              | 1.030               |
| 2513B       | 0.960                            | 4.300             | 0.680                           | 30.500           | 0.031                          | 1.758           | 0.947                              | 1.166               |
| 2513C       | 0.930                            | 4.400             | 0.850                           | 8.800            | 0.065                          | 1.855           | 0.971                              | 1.039               |
| 2850A       | 0.790                            | 23.500            | 0.840                           | 14.700           | 0.042                          | 1.795           | 0.733                              | 1.410               |
| 2867B       | 0.900                            | 9.300             | 0.830                           | 10.600           | 0.032                          | 1.340           | 0.859                              | 1.503               |
| 3063C       | 0.720                            | 34.000            | -                               | -                | 0.025                          | 1.733           | 0.809                              | 1.532               |
| 3073A       | 0.880                            | 40.400            | 0.820                           | 14.900           | 0.030                          | 1.288           | 0.861                              | 1.268               |
| 3231K       | 0.890                            | 15.800            | 0.830                           | 20.800           | 0.081                          | 1.774           | 0.231                              | 1.644               |
| 3246A       | 0.720                            | 19.600            | 0.510                           | 24.700           | 0.237                          | 1.401           | 0.463                              | 2.205               |
| 3246B       | 0.840                            | 17.400            | 0.430                           | 49.100           | 0.032                          | 1.965           | 0.942                              | 1.272               |
| 5155A       | 0.830                            | 41.500            | 0.230                           | 96.600           | 0.028                          | 1.763           | 0.915                              | 1.346               |
| 5185A       | 1.000                            | 2.700             | 0.990                           | 1.200            | 0.000                          | 0.000           | 0.917                              | 1.281               |
| 5376D       | 0.830                            | 25.700            | 0.750                           | 18.700           | 0.014                          | 1.171           | 0.808                              | 1.445               |
| 5495A       | 0.950                            | 9.600             | 0.330                           | 67.700           | 0.000                          | 0.000           | 0.967                              | 1.136               |
| 5584A       | 0.880                            | 33.400            | 0.520                           | 57.000           | 0.094                          | 2.164           | 0.936                              | 1.165               |
| 5764A       | 0.890                            | 36.100            | 0.660                           | 30.700           | 0.026                          | 1.263           | 0.948                              | 1.168               |
| 5778A       | 0.900                            | 6.300             | 0.890                           | 7.200            | 0.013                          | 1.758           | 0.757                              | 1.243               |
| 5925A       | 0.960                            | 3.600             | 0.990                           | 1.000            | 0.545                          | 1.262           | 0.979                              | 1.221               |
| 6219A       | 0.860                            | 25.600            | 0.760                           | 25.500           | 0.022                          | 0.608           | 0.864                              | 1.545               |
| 6272A       | 0.960                            | 17.600            | 0.780                           | 19.700           | 0.043                          | 0.861           | 0.992                              | 0.801               |
| 6374D       | 0.990                            | 1.700             | 0.850                           | 8.100            | 0.025                          | 1.262           | 0.979                              | 0.952               |
| 6478A       | 0.980                            | 2.600             | 0.490                           | 42.000           | 0.084                          | 1.896           | 0.971                              | 1.173               |
| 6551A       | 0.930                            | 4.400             | 0.870                           | 12.300           | 0.090                          | 0.897           | 0.954                              | 1.167               |
| 6555A       | 0.970                            | 2.400             | 0.480                           | 30.400           | 0.102                          | 1.964           | 0.958                              | 0.971               |
| 8011D       | 0.870                            | 11.300            | 0.200                           | 45.700           | 0.006                          | 1.770           | 0.854                              | 1.307               |
| 8015A       | 0.990                            | 2.200             | 0.350                           | 64.300           | 0.082                          | 1.992           | 0.993                              | 0.928               |
| 8116A       | 0.760                            | 49.800            | 0.880                           | 10.700           | 0.035                          | 1.715           | 0.844                              | 1.325               |
| <b>Avg.</b> | <b>0.885</b>                     | <b>17.734</b>     | <b>0.685</b>                    | <b>27.433</b>    | <b>0.067</b>                   | <b>1.425</b>    | <b>0.860</b>                       | <b>1.294</b>        |

\*Note: The data of MAINMAST and Rosetta are from MAINMAST paper (Terashi, et al. *Nature communications*, 2018). The labeled RMSD is used for MAINMAST and Rosetta. We use “-” to fill the fields that are not covered by the prediction. Non-labeled RMSD and matching percentage are calculated based on Phenix.chain\_comparison ([https://www.phenix-online.org/documentation/reference/chain\\_comparison.html](https://www.phenix-online.org/documentation/reference/chain_comparison.html)).

Table S4. Comparison of our method with state-of-the-art methods: Phenix, Rosetta-denovo, and MAINMAST using 3Å resolution simulated density maps\*.

| PDB     | T1          | TM-score |           |           |           | GDT-TS    |       |           |           | RMSD   |            |            |            | Coverage of Residues in predicted structure |            |            |             |
|---------|-------------|----------|-----------|-----------|-----------|-----------|-------|-----------|-----------|--------|------------|------------|------------|---------------------------------------------|------------|------------|-------------|
|         |             | T2       | T3        | T4        | T5        | T2        | T3    | T4        | T5        | T2     | T3         | T4         | T5         | T2                                          | T3         | T4         | T5          |
| 3i2n    | 357/<br>345 | 0.345    | 0.26<br>9 | 0.21<br>7 | -         | 0.20<br>5 | 0.251 | 0.12<br>3 | -         | 16.603 | 18.66<br>6 | 20.5<br>95 | -          | 80.1<br>1%                                  | 43.98<br>% | 69.19<br>% | -           |
| 3n2t    | 348/<br>327 | 0.818    | 0.71<br>3 | 0.91<br>3 | 0.90<br>0 | 0.57<br>3 | 0.676 | 0.84<br>8 | 0.76<br>6 | 3.397  | 2.111      | 2.65<br>3  | 3.23<br>9  | 100.<br>00%                                 | 70.69<br>% | 93.10<br>% | 93.10<br>%  |
| 3qc7    | 179/<br>164 | 0.522    | 0.80<br>9 | 0.71<br>1 | 0.25<br>5 | 0.38<br>4 | 0.803 | 0.65<br>7 | 0.19<br>1 | 5.030  | 1.281      | 3.91<br>3  | 13.3<br>54 | 100.<br>00%                                 | 78.21<br>% | 88.27<br>% | 88.27<br>%  |
| 5i68    | 663/<br>662 | 0.726    | 0.49<br>3 | 0.33<br>5 | 0.36<br>4 | 0.32<br>5 | 0.455 | 0.26<br>3 | 0.25<br>8 | 5.961  | 8.027      | 24.6<br>18 | 27.8<br>10 | 100.<br>00%                                 | 54.45<br>% | 66.82<br>% | 99.85<br>%  |
| 6ahv    | 363/<br>345 | 0.846    | 0.55<br>8 | 0.79<br>5 | 0.78<br>0 | 0.62<br>5 | 0.527 | 0.67<br>0 | 0.59<br>6 | 3.125  | 2.914      | 5.00<br>3  | 5.49<br>7  | 100.<br>00%                                 | 57.30<br>% | 96.14<br>% | 95.04<br>%  |
| 6eyw    | 427/<br>381 | 0.265    | 0.84<br>8 | 0.81<br>5 | 0.18<br>5 | 0.21<br>7 | 0.833 | 0.76<br>4 | 0.08<br>1 | 17.335 | 1.340      | 6.99<br>4  | 22.8<br>94 | 100.<br>00%                                 | 79.39<br>% | 85.48<br>% | 100.0<br>0% |
| 6g61    | 133/<br>111 | 0.234    | 0.93<br>1 | 0.25<br>1 | 0.55<br>3 | 0.20<br>1 | 0.941 | 0.24<br>6 | 0.52<br>7 | 12.657 | 1.968      | 0.22<br>5  | 7.58<br>7  | 100.<br>00%                                 | 81.20<br>% | 82.71<br>% | 100.0<br>0% |
| Average |             | 0.537    | 0.66<br>0 | 0.57<br>7 | 0.50<br>6 | 0.36<br>1 | 0.641 | 0.51<br>0 | 0.40<br>3 | 9.158  | 5.187      | 9.14<br>3  | 13.3<br>97 | 97.1<br>6%                                  | 66.46<br>% | 83.10<br>% | 96.04<br>%  |

\*Note - T1: Residues in sequence/native; T2: Our method; T3: Rosetta de-novo; T4: Phenix; T5: MAINMAST. The labeled RMSD is used for MAINMAST and Rosetta.

Table S5. Comparison of our method with state-of-the-art methods: Phenix, Rosetta-denovo, and MAINMAST in three experimental maps\*.

| PDB            | Method               | Fragments            | TM-score             | GDT-TS | RMSD   |        |
|----------------|----------------------|----------------------|----------------------|--------|--------|--------|
| 6272           | Our method           | Full_length (1-397)  | 0.932                | 0.809  | 2.133  |        |
|                | Rosetta-Denovo       | Full_length (1-397)  | 0.581                | 0.534  | 11.432 |        |
|                |                      | Fragment 1 (1-47)    | 0.844                | 0.894  | 1.802  |        |
|                |                      | Fragment 2 (67-158)  | 0.802                | 0.81   | 1.766  |        |
|                |                      | Fragment 3 (216-310) | 0.532                | 0.513  | 7.113  |        |
|                |                      | Fragment 4 (338-397) | 0.749                | 0.796  | 0.675  |        |
|                |                      | Phenix               | Full_length (1-397)  | 0.6144 | 0.5164 | 16.914 |
|                | Fragment 1 (1-144)   |                      | 0.77                 | 0.748  | 14.038 |        |
|                | Fragment 2 (149-266) |                      | 0.175                | 0.146  | 0.095  |        |
|                | Fragment 3 (273-396) |                      | 0.789                | 0.768  | 2.825  |        |
|                | MAINMAST             | Full_length (1-397)  | 0.528                | 0.334  | 14.79  |        |
|                | 5778                 | Our method           | Full_length (1-586)  | 0.452  | 0.286  | 24.342 |
|                |                      |                      | Fragment 1 (253-581) | 0.702  | 0.509  | 6.497  |
|                |                      |                      | Fragment 2 (167-245) | 0.402  | 0.459  | 5.51   |
| Rosetta-Denovo |                      | Full_length (1-586)  | 0.168                | 0.161  | 0.142  |        |
|                |                      | Fragment 1 (464-574) | 0.848                | 0.842  | 0.964  |        |
| Phenix         |                      | Full_length (1-586)  | 0.219                | 0.173  | 15.186 |        |
|                |                      | Fragment 1 (87-117)  | 0.359                | 0.444  | 8.473  |        |
|                |                      | Fragment 2 (354-423) | 0.461                | 0.577  | 15.214 |        |
|                |                      | Fragment 3 (470-493) | 0.587                | 0.875  | 1.622  |        |
|                |                      | Fragment 4 (519-579) | 0.667                | 0.742  | 2.448  |        |
| MAINMAST       |                      | Full_length (1-586)  | 0.354                | 0.129  | 20.636 |        |

|      |                |                      |       |       |        |
|------|----------------|----------------------|-------|-------|--------|
| 8410 | Our method     | Full_length (1-890)  | 0.475 | 0.251 | 48.191 |
|      |                | Fragment 1 (78-560)  | 0.786 | 0.46  | 4.455  |
|      | Rosetta-Denovo | Full_length (1-890)  | 0.076 | 0.072 | 9.66   |
|      |                | Fragment 1 (284-300) | 0.579 | 0.927 | 1.663  |
|      |                | Fragment 2 (395-406) | 0.377 | 0.708 | 7.097  |
|      |                | Fragment 3 (479-499) | 0.468 | 0.976 | 0.637  |
|      |                | Fragment 4 (742-755) | 0.573 | 0.946 | 0.91   |
|      |                | Fragment 5 (835-850) | 0.387 | 0.906 | 1.045  |
|      | Phenix         | Full_length (1-890)  | 0.184 | 0.093 | 51.833 |
|      |                | Fragment 1 (1-221)   | 0.239 | 0.192 | 33.084 |
|      |                | Fragment 2 (366-462) | 0.308 | 0.312 | 16.039 |
|      |                | Fragment 3 (754-823) | 0.176 | 0.225 | 12.38  |
|      | MAINMAST       | Full_length (1-890)  | 0.119 | 0.025 | 41.171 |

\*Note: The labeled RMSD is used for MAINMAST and Rosetta.



## Impact of Manual Threshold Selection

As mentioned in the Methods section, voxels below a certain threshold are zeroed out in a pre-processing step. This aims to reduce noise and allows the CNN to focus on high intensity voxels. However, this threshold has to be selected manually, which is a non-trivial task prone to error. Therefore, we examine how sensitive the accuracy of the backbone predictions is to variations in the selected threshold. To do so, we predict the backbone structure of three density maps using varying thresholds in a range of -100% to +100% of the manually selected threshold (see Table S6). As we can see the prediction accuracy is affected by the selected threshold, however, only to a limited extent. Particularly within the range of -25% to +25% of the manually selected threshold the accuracy variations are only minor.

Table S6. Prediction results of three density maps for thresholds varying between -100% to +100% of the manually selected threshold

| Thresh<br>old | EMD 8482    |      |               | EMD 8515    |      |               | EMD 8642    |      |               |
|---------------|-------------|------|---------------|-------------|------|---------------|-------------|------|---------------|
|               | Pred.<br>Ca | RMSD | % Ca<br>in 3Å | Pred.<br>Ca | RMSD | % Ca<br>in 3Å | Pred.<br>Ca | RMSD | % Ca<br>in 3Å |
| -100%         | 5334        | 1.74 | 76.4          | 5225        | 1.34 | 75.2          | 4187        | 1.50 | 74.7          |
| -75%          | 2770        | 1.63 | 77.1          | 4815        | 1.25 | 76.6          | 2339        | 1.49 | 74.6          |
| -50%          | 1677        | 1.67 | 74.6          | 4505        | 1.23 | 75.4          | 1198        | 1.54 | 74.6          |
| -25%          | 1229        | 1.60 | 71.6          | 4042        | 1.26 | 76.6          | 819         | 1.39 | 84.3          |
| 0%            | 1098        | 1.60 | 70.2          | 3594        | 1.12 | 76.5          | 731         | 1.36 | 84.8          |
| +25%          | 1021        | 1.61 | 70.4          | 3201        | 1.10 | 76.9          | 657         | 1.31 | 83.4          |
| +50%          | 914         | 1.63 | 66.2          | 2962        | 1.07 | 74.9          | 577         | 1.36 | 76.5          |
| +75%          | 833         | 1.64 | 62.0          | 2824        | 1.10 | 74.4          | 500         | 1.45 | 67.4          |
| +100%         | 698         | 1.70 | 55.5          | 2736        | 1.13 | 72.3          | 429         | 1.48 | 58.2          |

# Runtime of Predictions

In the following chart we can see the runtime of the predictions relative to how many backbone C $\alpha$  atoms were predicted. The time is measured for the end-to-end processing time. However, the vast majority of the time is spent on the global Tabu-Search and chain tracing algorithm in post-processing step. The C-CNN voxel prediction step only takes less than a minute, even for the large maps. The format of the elapsed time is 'hh:mm:ss'.

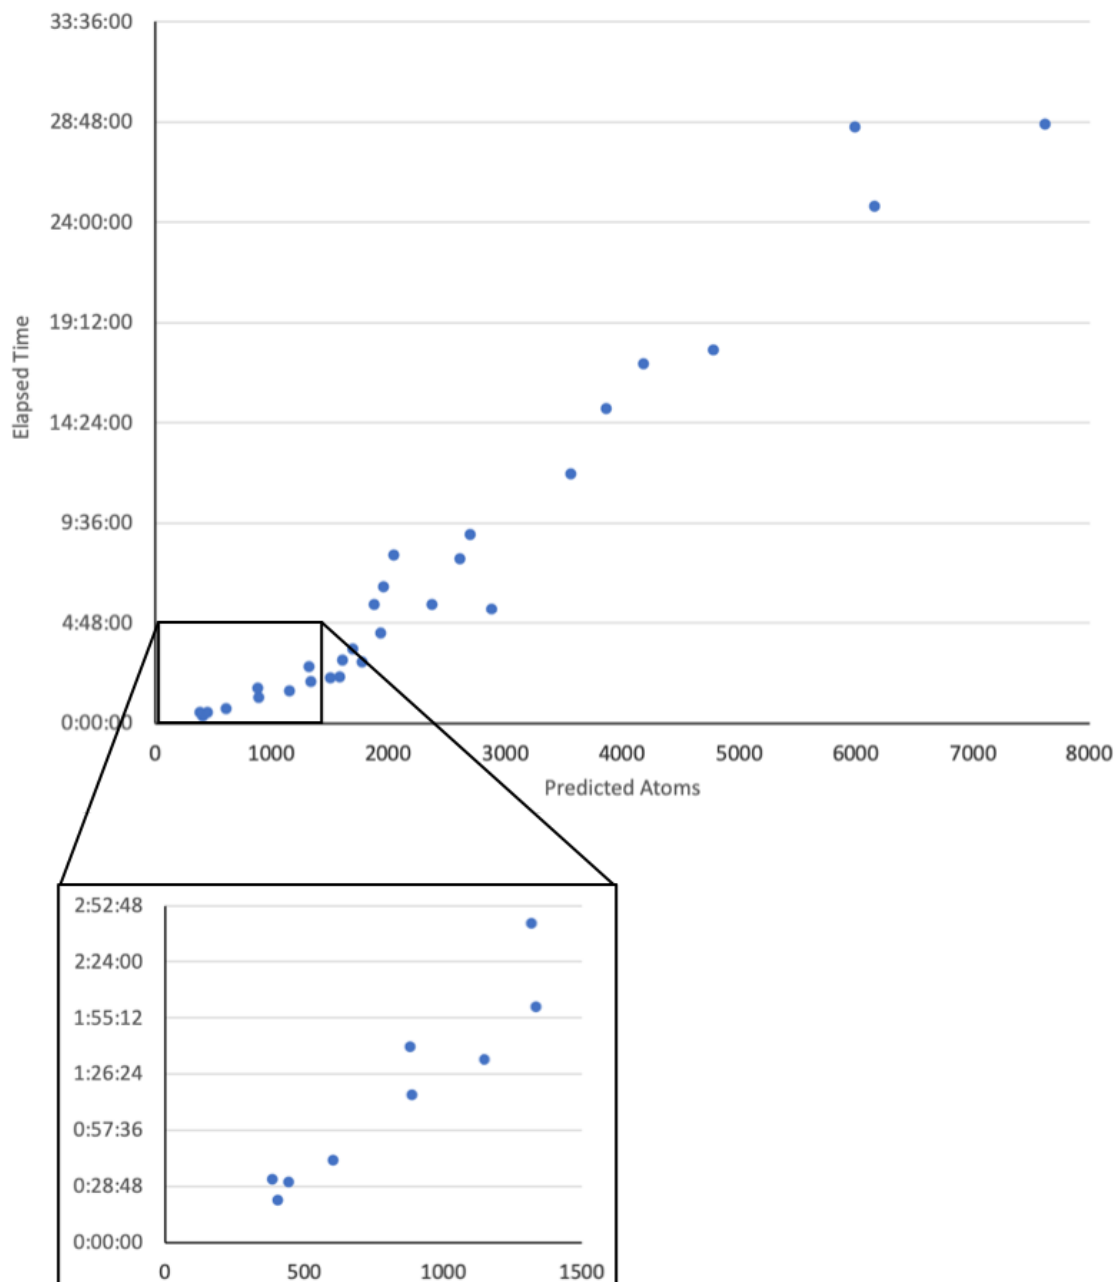

# Tabu-Search Algorithm

Below is the Python pseudo-code for our tabu-search algorithm. The confidence map corresponds to the Ca confidence map that is returned from the C-CNN. The result of the method is a list of traces and each trace is in itself a list of atoms. The `confidence_map[atom]` value expresses the confidence value at the location of an atom.

```
def tabu_search(confidence_map):
    traces = []
    while next_atom(confidence, traces) is not None:
        # Atom at which trace is continued
        atom = next_atom(confidence, traces)

        # Find next best atom to continue trace
        neighbor_atom = find_nearest_atom(atom, confidence_map)
        if neighbor_atom is not None:
            # Append neighbor atom to corresponding trace
            append_to_trace(traces, atom, neighbor_atom)

    return traces

def next_atom(confidence_map, traces):
    if len(traces) > 0:
        possible_atoms = []
        for trace in traces:
            # Only the first and last atom of each trace can be the next atom
            possible_atoms += [trace[0], traces[-1]]

        # Return atom with the highest value in the Ca confidence map
        return max(possible_atoms, key=lambda atom: confidence_map[atom])
    else:
        # Atom at global max in Ca confidence map
        atom = global_max(confidence_map)

        # Return atom if its confidence value is higher than some threshold
        return atom if confidence_map[atom] >= 0.5 else None
```

## Preprocessing

The experimental cryo-EM maps were segmented using UCSF Chimera's "zone" tool if the deposited structure is only fitted in part of the density map, as described in the Rosetta and MAINMAST paper. The first step of the preprocessing was to use hideDust in Chimera to remove any dust from the density map (optional step). This was done with setting the contour levels to low and high to visualize the dust and then using Chimera's command hideDust to pick a size that removed any outliers that were making noise. The hide dust sizes and the low or high level contour levels could be inputted as a json file to the program.

## Running Rosetta-Denovo:

Rosetta (rosetta\_bin\_linux\_2018.33.60351\_bundle) was used. We followed the tutorial released on <http://dimaiolab.ipd.uw.edu/software/>. Almost all the parameters used were as described in the tutorial, but some specific parameters were taken from the following paper: Wang, R. Y. R., Kudryashev, M., Li, X., Egelman, E. H., Basler, M., Cheng, Y., Baker, D., & DiMaio, F. (2015). De novo protein structure determination from near-atomic-resolution cryo-EM maps. *Nature Methods*, 12(4), 335-338.

First, fragment structures for the query protein were generated on the Robetta website: <http://rosetta.bakerlab.org/fragmentqueue.jsp>

### 1. Local Fragment search in an input EM map using denovo\_density.

This procedure searches the density map for each sequence-predicted backbone fragment generated in the previous step.

```
$ROSETTA3/source/bin/denovo_density.static.linuxgccrelease \  
-in::file::fasta ./target.seq \  
-fragfile ./aaabini09_05.200_v1_3 \  
-startmodel ./start_model.pdb \  
-mapfile ./MAP.mrc \  
-n_to_search 1500 -n_filtered 3000 -n_output 100 \  
-bw 16 \  
-atom_mask_min 2 \  
-atom_mask 3 \  
-clust_radius 2 \  
-clust_oversample 4 \  
-movestep 1 \  
-delR 2 \  
-frag_dens 0.8 \  
-ncyc 3 \  
-min_bb false \  
-pos $1 \  
-out::file::silent round$2/fragment.$1.silent
```

### 2. Placed fragment scoring using denovo\_density:

This step score the placement of fragments for compatibility to the EM map.

```
$ROSETTA3/source/bin/denovo_density.static.linuxgccrelease \  
-mode score \  
-in::file::silent round1/fragment*silent \  
-scorefile round1/scores1 \  
-n_matches 50
```

### 3. Monte Carlo fragment assembly using denovo\_density:

This step generates “maximally consistent” fragment assembly in the map.

```
$ROSETTA3/source/bin/denovo_density.static.linuxgccrelease \  
-mode assemble \  
-nstruct 5 \  
-in::file::silent round1/fragment*silent \  
-scorefile round1/scores1
```

```
-assembly_weights 4 20 6 \  
-null_weight -150 \  
-out:file:silent round1/assembled.$1 \  
-scale_cycles 1 \  
-mute core
```

#### 4. Consensus assignment using denovo\_density:

This step is to identify the consensus assignment from the lower-scoring Monte Carlo Trajectories.

```
$ROSETTA3/source/bin/denovo_density.static.linuxgccrelease \  
-mode consensus \  
-in::file::silent round1/assembled.*silent \  
-consensus_frac 1.0 -energy_cut 0.05 \  
-mute core
```

If the assigned backbone residues are less than 70% of the target protein or the coverage is not converged, we iterate the four (1-4) steps.

## Running Phenix:

We followed the tutorials of Phenix(1.16-3549) released on [https://www.phenix-online.org/documentation/reference/map\\_to\\_model.html](https://www.phenix-online.org/documentation/reference/map_to_model.html). The default parameters are used, and the command is as follows:

```
phenix.auto_sharpen 6272.mrc resolution=2.6 sharpened_map_file=density.ccp4
```

```
phenix.map_to_model density.ccp4 seq_file=6272.fasta resolution=2.6 nproc=10 pdb_out=result.pdb find_symmetry=True  
thoroughness=quick
```

## Running MAINMAST:

We followed the tutorials of MAINMAST released on <http://kiharalab.org/mainmast/Tutorials.html>. The following command is used:

For segmented map:

```
$MAINMAST/MAINMAST -m target.situs -filter 0.3 -Rlocal 10 > target_path.pdb
```

For simulated map:

```
$MAINMAST/MAINMAST -m target.situs -filter 0.3 -Dkeep 1.0 -Ntb 10 -Rlocal 5 -Nlocal 50 -Nround 50 > target_path.pdb
```

For threading:

```
$MAINMAST/ThreadCA -i target_path.pdb -a $MAINMAST/20AA.param -spd target.spd3 -fw 1.3 -Ab 3.3 -Wb 0.9 > prediction.pdb
```
